# Supplementary material
Source: PubMed Central journal article supplement (PMC8091019)
Supplement: AEM.02970-20-s0001.pdf [file AEM.02970-20-s0001.pdf]

1 McbG, a LysR family transcriptional regulator activates the  
2 *mcbBCDEF* gene cluster involved in the upstream pathway of  
3 carbaryl degradation in *Pseudomonas* sp. XWY-1

4 Zhijian Ke, <sup>a</sup> Yidong Zhou, <sup>a</sup> Wankui Jiang, <sup>a</sup> Mingliang Zhang, <sup>a</sup> Hui Wang, <sup>a</sup> Yijun  
5 Ren, <sup>a</sup> Jiguo Qiu, <sup>a</sup> Minggen Cheng, <sup>a</sup> Qing Hong, <sup>a</sup>#

6

7 <sup>a</sup> Key Laboratory of Agricultural Environmental Microbiology, Ministry of  
8 Agriculture, College of Life Sciences, Nanjing Agricultural University, Nanjing,  
9 Jiangsu 210095, PR China.

10

11 # Author for correspondence: Qing Hong

12 E-mail address: [hongqing@njau.edu.cn](mailto:hongqing@njau.edu.cn);

13 Tel: +86-25-84396685; Fax: +86-25-84395326

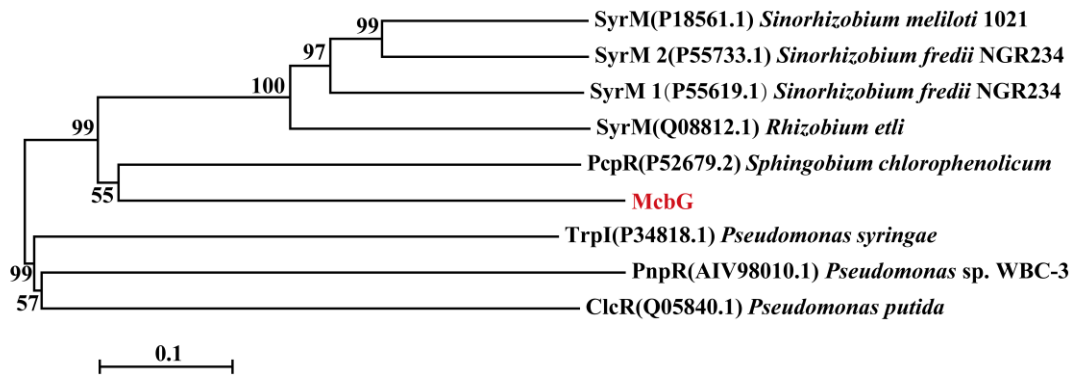

14

15 **FIG S1** Phylogenetic analysis of McbG and related protein by neighbor-joining

16 method. Bootstrap values (%) are indicated at the nodes, the scale bar represents 0.1

17 substitutions per site.

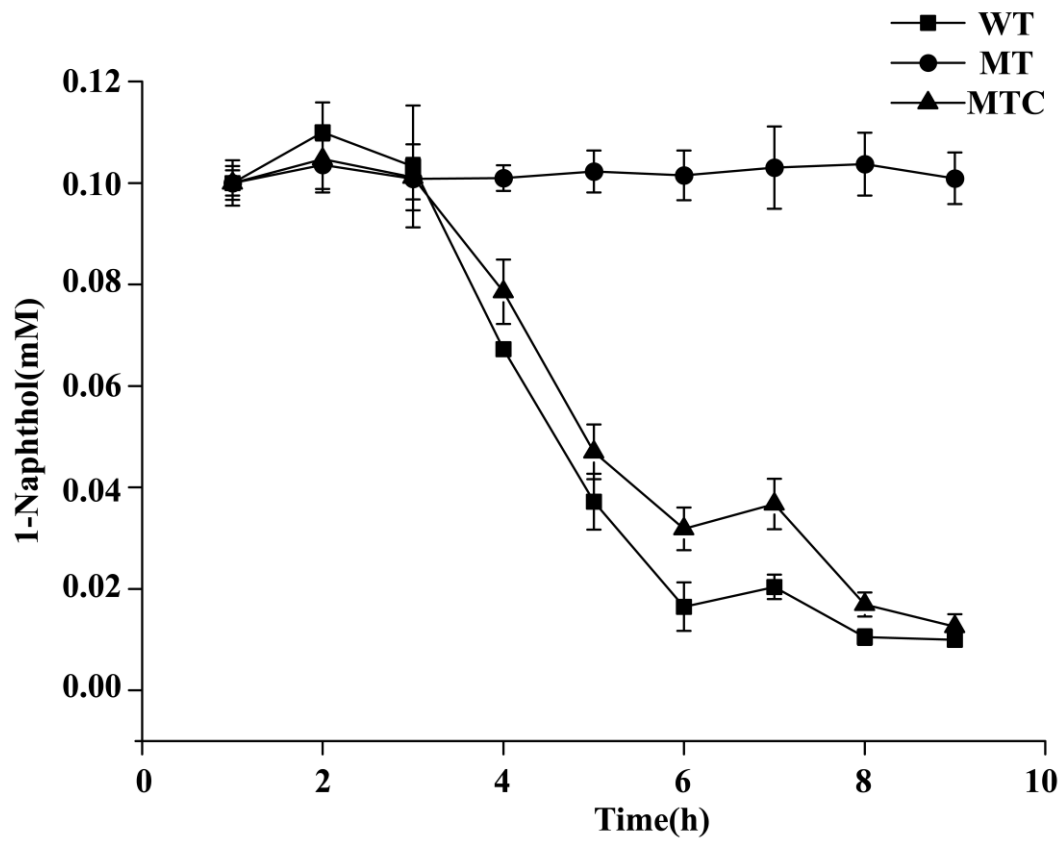

18

19 **FIG S2** Degradation of 1-naphthol by wild-type strain XWY-1 (WT), the *mcbG*

20 knockout mutant strain (MT) and the *mcbG*-complemented strain (MTC).

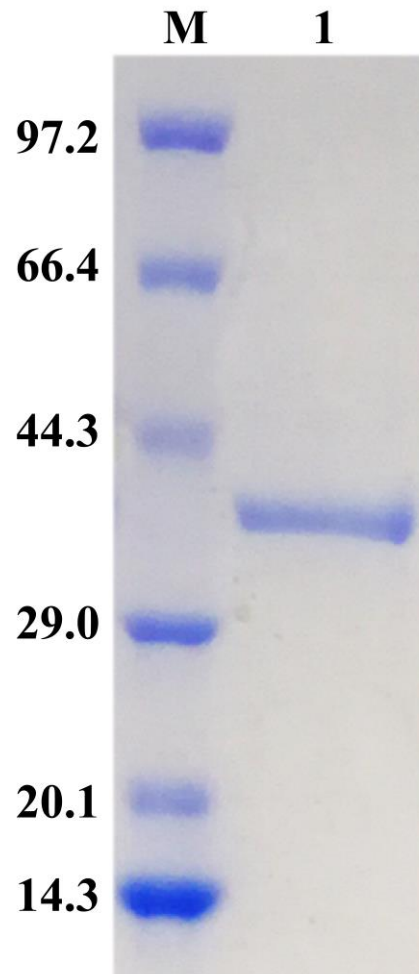

21

22 **FIG S3** SDS-PAGE analysis of the purified McbG stained with Coomassie Brilliant

23 Blue. Lane M contains protein standards and lane 1 contains purified N-terminal

24 His8-tagged McbG.

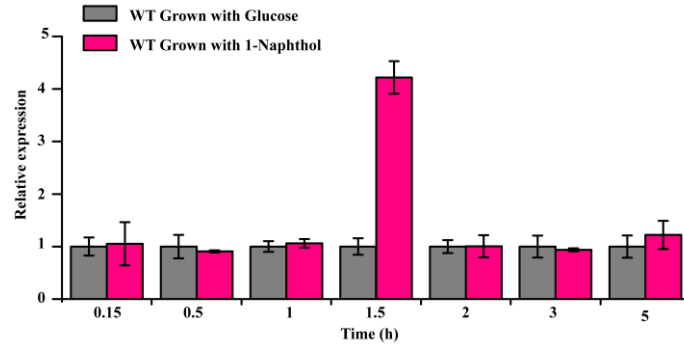

25

26 **Fig S4** The transcriptional level of *mcbG* in strain XWY-1 (WT) in the presence of 0.1  
 27 mM glucose or 0.1 mM 1-naphthol. The transcriptional level of the 16S rRNA gene  
 28 was used as an internal standard, and the data in each column were calculated by the  
 29  $2^{-\Delta\Delta CT}$  threshold cycle ( $C_T$ ) method using 3 replicates. The samples were taken at 0.15  
 30 h, 0.5 h, 1 h, 1.5 h, 2 h, 3 h and 5 h.

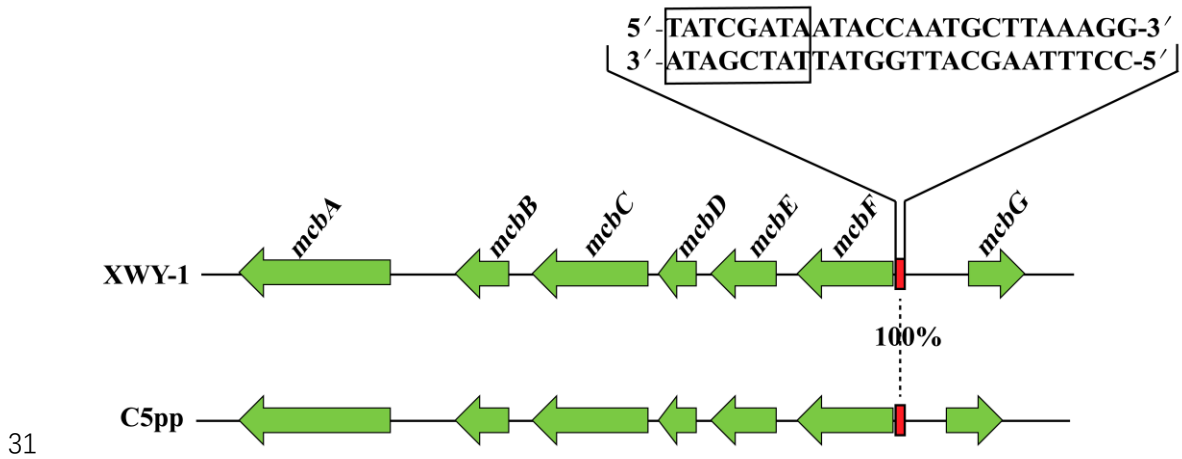

31  
32 **FIG S5** Comparison analysis of the *mcbABCDEF* cluster in strains XWY-1 and  
33 C5pp. The sequence shows that McbG binding site is identical in strains C5pp and  
34 XWY-1.

35  
36  
37  
38  
39  
40  
41  
42  
43  
44  
45  
46  
47

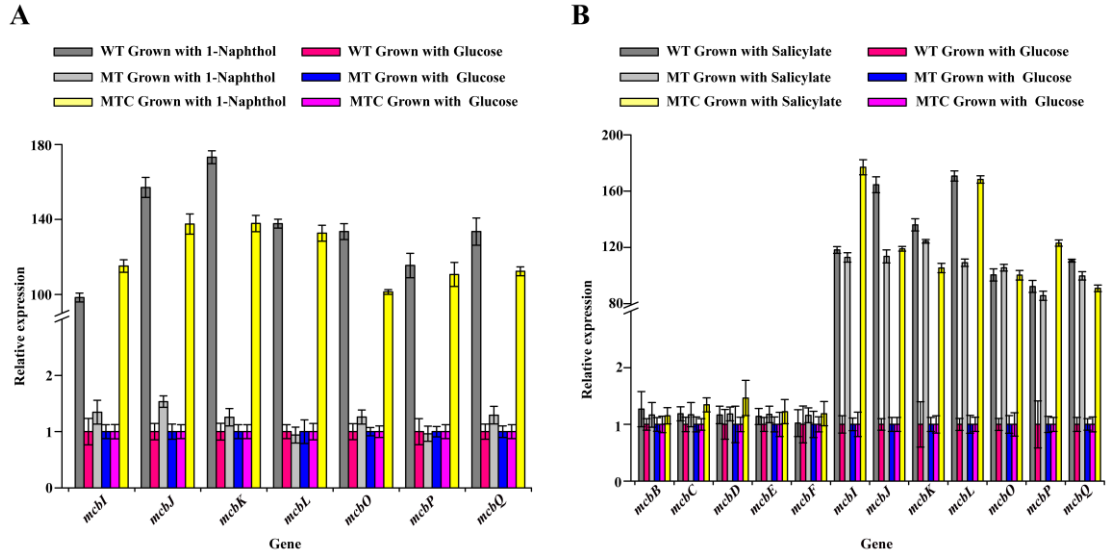

48

49 **FIG S6** (A) Transcriptional analysis of *mcbIJKL* and *mcbOPQ* gene clusters in the  
 50 XWY-1 (WT), the *mcbG* knockout mutant (MT), and the *mcbG*-complemented strain  
 51 (MTC) in the presence of 0.1 mM glucose or 0.1 mM 1-naphthol. The transcriptional  
 52 level of the 16S rRNA gene was used as an internal standard, and the data in each  
 53 column were calculated by the  $2^{-\Delta\Delta CT}$  threshold cycle ( $C_T$ ) method using 3 replicates.

54 (B) Transcriptional analysis of *mcbBCDEF*, *mcbIJKL* and *mcbOPQ* gene clusters in  
 55 the XWY-1 (WT), the *mcbG* knockout mutant (MT), and the *mcbG*-complemented  
 56 strain (MTC) in the presence of 0.1 mM glucose or 0.1 mM salicylate. The  
 57 transcriptional level of the 16S rRNA gene was used as an internal standard, and the  
 58 data in each column were calculated by the  $2^{-\Delta\Delta CT}$  threshold cycle ( $C_T$ ) method using 3  
 59 replicates.

60

61

62

63
